1        **Symbiotic bacterial community of *Drosophila melanogaster* changes with nutritional**  
2        **modifications of the diet but can alleviate negative effects on larval phenotypes**

3        Andrei Bombin \*, Owen Cunneely, Sergei Bombin, Kira Eickman, Abigail Ruesy, Rachael  
4        Cowan, Abigail Myers, Mengting Su, Jonathan Mosley, Jane Ferguson, and Laura Reed\*

5        Correspondence: [abombin@crimson.ua.edu](mailto:abombin@crimson.ua.edu) (A.B.); [lreed1@ua.edu](mailto:lreed1@ua.edu) (L.R.)

6        **ABSTRACT**

7        Obesity is an increasing pandemic and is caused by multiple factors including genotype,  
8        psychological stress, and gut microbiota. Our project investigated the effects produced by high  
9        fat and high sugar dietary modifications on microbiota and metabolic phenotype of *Drosophila*  
10        *melanogaster*. Larvae raised on the high fat and high sugar diets exhibited bacterial communities  
11        that were compositionally and phylogenetically different from bacterial communities of the  
12        larvae raised on normal diets, especially if parental microbiota were removed. Several of the  
13        dominant bacteria taxa that are commonly associated with high fat and high sugar diets across  
14        model organisms and even human populations showed similar pattern in our results.  
15        *Corynebacteriaceae* and *Erysipelotrichaceae* were connected with high fat food, while  
16        *Enterobacteriaceae* and *Lactobacillaceae* were associated with high sugar diets. In addition, we  
17        observed that presence of symbiotic microbiota often mitigated the effect that harmful dietary  
18        modifications produced on larvae, including elevated triglyceride concentrations and was crucial  
19        for *Drosophila* survival, especially on high sugar peach diets.

20        **INTRODUCTION**

21           The pandemic of obesity contributes to the increase in multiple health conditions  
22 including hypertension and type two diabetes mellitus among many others (Seganfredo et al.,  
23 2017, Wahba and Mak, 2007, Thompson et al., 2007). The problem of obesity is further  
24 complicated by the diversity of causal factors such as dietary habits, genotype, epigenetic  
25 regulation, psychological stress, sleep deprivation, and gut microbiota composition (Seganfredo  
26 et al., 2017, Han and Lean, 2016). These issues make the development of an efficient treatment a  
27 complex problem requiring a multivariate research approach (Thompson et al., 2007, Kaur,  
28 2014).

29           Diet influences metabolic phenotypes and longevity of *Drosophila*. Raising *D.*  
30 *melanogaster* larvae on a high sugar diet (86.4% of total calories available from carbohydrates)  
31 resulted in a smaller body size, delayed development, elevated glucose, trehalose, and reduced  
32 glycogen concentrations of the larvae (Musselman et al., 2011). In addition, those larvae  
33 developed a reduced insulin sensitivity and had higher triglyceride concentrations, overall  
34 exhibiting a diabetic phenotype (Musselman et al., 2011). A high sugar diet also significantly  
35 decreases the pupal weight (Reed et al., 2010). Obesity, induced by high sugar diet, increases  
36 with aging of the flies (Skorupa et al., 2008). A high fat diet can also produce an obese  
37 phenotype in *Drosophila*, which results in higher triglyceride levels and disturbs insulin  
38 homeostasis (Birse et al., 2010). In addition, a diet rich in fats leads to similar effects in body  
39 mass and development rate as a high sugar diet and also produces transgenerational effects  
40 (Musselman et al., 2011, Dew-Budd et al., 2016). An obese phenotype is harmful for *Drosophila*  
41 fitness. Higher fat mass storage was shown to reduce longevity of flies and resulted in lower  
42 fecundity (Moghadam et al., 2015). On the opposite side of the spectrum, diets restricted in  
43 sugars and/or yeast consumption were shown to increase life span (Mair et al., 2005).

44 In *D. melanogaster*, microbiota influence several life history traits and metabolic  
45 phenotypes such as survival until pupation, development time, weight, protein, triglyceride, and  
46 glucose concentrations (Newell and Douglas, 2014, Dobson et al., 2015, Huang and Douglas,  
47 2015). Interestingly, the impact of harmful diets, such as high fat and high sugar, forms a  
48 phenotype similar to flies that have a removal of symbiotic microbiota. For example, axenic flies  
49 often exhibit elevated glucose and triglyceride levels (Wong et al., 2014, Henry et al., 2020a). In  
50 addition, certain microbial taxa from *Acetobacter* and *Lactobacillus* genera may reduce host  
51 appetite for essential amino acids and increase the appetite for sugar consumption; thereby  
52 potentially providing the host with the essential amino acids and competing for available sugars  
53 (Leitão-Gonçalves et al., 2017).

54 Several studies demonstrated the differences in the symbiotic microbiota community of  
55 the wild flies and lab raised flies (Chandler et al., 2011, Vacchini et al., 2017, Tefit et al., 2017).  
56 In our previous work, we also observed that larvae raised on the natural peach diet and standard  
57 lab diet exhibited a substantial difference in the microbiota composition. It was also  
58 demonstrated that in *Drosophila* and mouse models, the effect that symbiotic microbiota  
59 provides on host phenotype may vary with diet, genotype, and their interactive effects (Wong et  
60 al., 2014, Kreznar et al., 2017, Henry et al., 2020a, Zhang et al., 2009, Org et al., 2015).

61 We raised *Drosophila* from five *Drosophila* Genetic Reference Panel (DGRP2) lines until  
62 late third instar larval stage on standard lab diets and peach-based diets modifying them with  
63 addition of extra sugars or fats, to mimic the westernized diet. In order to control for the action of  
64 live environmental and parental microbiota we also used an autoclaved variant of each of the  
65 peach-based diets and used larvae from sterilized and non-sterilized embryos. Therefore, our  
66 study is equipped to evaluate the interaction between harmful dietary modifications and

67 *Drosophila*'s natural microbiota composition, while controlling for effects produced by genotype  
68 and parental microbiota. We hypothesized that nutritional modifications will cause shifts in  
69 larval bacterial community composition and metabolic phenotypes, however natural microbiota  
70 would alleviate negative metabolic effects caused by high fat and high sugar diets.

## 71 **MATERIALS AND METHODS**

72 **Diet Preparation.** Mixtures of naturally decayed peaches were prepared (homogenized)  
73 and stored, and then used to create the peach-based diet (peach regular - PR) using the  
74 procedures described in Bombin et al. (Bombin et al., 2020). The standard lab diet (R) diets were  
75 also prepared according to the protocols described previously (Dew-Budd et al., 2016, Mendez et  
76 al., 2016, Watanabe and Riddle, 2017, Bombin et al., 2020). In addition, high sugar and high fat  
77 diet variants were prepared for both peach-based diet and regular *Drosophila* lab-based diets as  
78 described below. All diet types were distributed with 10 mL of food per *Drosophila* culture vial.

79 To prepare the peach high-fat diet (PHF) we allowed one liter of the regular peach diet to  
80 thaw before supplementing it with coconut oil in an amount equal to 3% of the total mixture  
81 weight, then warmed the mixture to 28 °C (to melt the coconut oil). The mixture was then  
82 completely homogenized it with an immersion blender before distributing it into vials. To  
83 prepare the regular high-fat diet (RHF) we supplemented one liter of liquid *Drosophila*  
84 cornmeal-molasses standard lab diet with 30g of coconut oil (3%) during cooking, thoroughly  
85 mixed it and distributed it into vials to solidify. To prepare the peach high-sugar diet (PHS) we  
86 allowed one liter of the regular peach diet to thaw before supplementing it with sucrose in an  
87 amount equal to 11% by weight, then completely homogenized it with an immersion blender  
88 before distributing it into vials. In order to prepare peach high fat autoclaved (PHFA), peach high

89 sugar 11% autoclaved (PHSA11), and peach high sugar 6% autoclaved (PHSA6) diets, vials  
90 containing the corresponding food were autoclaved for 25 min at 121 °C. Since our first results  
91 indicated that most of the tested genotypes could not survive on PHSA11 if the embryos went  
92 through a sterilization treatment, the PHSA6 diet was introduced in the second and third rounds  
93 of the experiment. PHSA6 diet was prepared as described above for PHSA11 but with only 6%  
94 extra sucrose added by weight. To prepare the regular high-sugar diet (RHS) we supplemented  
95 one liter of the *Drosophila* standard lab diet described above with 90 g of sucrose (to make 13%  
96 sugar diet which is similar in sugar content with our PHS diet) before the mixture solidified  
97 during cooking, then it was completely homogenized by thoroughly mixing it before distributing  
98 it into vials.

99 **Drosophila stocks and husbandry.** For the high-sugar portion of the study, the  
100 following five naturally derived genetic lines were sourced from the Drosophila Genetic  
101 Reference Panel (DGRP2): **153, 748, 787, 802, and 805** (Mackay et al., 2012, Huang et al.,  
102 2014). For the high-fat portion of the study, the following 10 naturally derived genetic lines were  
103 sourced from the DGRP2 project: **142, 153, 440, 748, 787, 801, 802, 805, 861, and 882** (Mackay  
104 et al., 2012, Huang et al., 2014). These lines were selected because they showed a diversity of  
105 phenotypic responses to diet modifications in preliminary studies. These stocks were maintained  
106 using the procedures as described in previous works, maintaining them at a constant temperature  
107 (25 °C), humidity (50%), 12:12h light: dark cycle (Dew-Budd et al., 2016, Mendez et al., 2016).

108 **Drosophila embryos sterilization.** In order to test for the effects of the parental  
109 microbiota, surface sterilized (S) and non-sterilized (NS) embryos were prepared as described in  
110 Bombin et al. (Bombin et al., 2020), prior to being placed on their respective diet treatments.

111           **Larval rearing and collection.** Due to the nature of rearing and collecting and the large  
112 number of larvae required, this portion of the study was carried out in separate high-fat and high-  
113 sugar portions. Each portion of the study followed the same pattern. Across three separate time  
114 periods (~25-30 days apart), 50 sterilized or non-sterilized larvae of each genetic line were added  
115 to each diet types. For the high-fat study, there were at least three vials each of PHF, PHFA,  
116 RHF, PA, PR and R diet. For the high-sugar component, there were at least three vials each of  
117 PHS, PHSA11 (from the second round, PHSA6% and PHSA11% to help mitigate low survival  
118 on a diet containing 11% sucrose), RHS, PA, PR, and R diets. For the HS study, only NS larvae  
119 were used for PR and R diets as controls. Larvae were allowed to develop until the late 3<sup>rd</sup> instar  
120 stage and were subsequently collected, sorted, and stored frozen following the protocols  
121 described in Bombin et al. (Bombin et al., 2020).

122           **Measuring Experimental Phenotypes.** The measured experimental phenotypes of  
123 **survival** (proportion of larvae survival to 3rd instar), **developmental rate** (days to 3rd instar  
124 larva), and **weight** of individual 3rd instar larvae were measured as described in Bombin et al.  
125 (Bombin et al., 2020). **Triglyceride** concentrations were quantified, by homogenizing 10 3<sup>rd</sup>  
126 instar larvae per sample and measuring the total triglyceride concentration using the Sigma  
127 triglyceride Determination Kit (Clark and Keith, 1988, De Luca et al., 2005, Reed et al., 2010).  
128 Results were adjusted to represent the average triglyceride concentration per mg of dry larval  
129 weight. **Protein** concentrations were quantified using the Bradford's method with 10  
130 homogenized larvae per sample (with the exception of 3% of HF and 1% of HS samples, in  
131 which we used one to nine larvae due to especially low survival rates of the specific groups)  
132 (Bradford, 1976, Dew-Budd et al., 2016). Protein values were averaged to represent the protein  
133 concentration per mg of dry larvae weight. **Glucose** concentrations were quantified via

134 homogenization of 10 larvae (with the exception of several HF and HS samples in which we  
135 used one to nine larvae) with subsequent overnight incubation in 1 µg/mL trehalase solution and  
136 further application of the Sigma Glucose Determination Kit as described in Bombin et al.  
137 (Bombin et al., 2020). Glucose concentrations were averaged and adjusted to represent the  
138 amount of glucose per mg of dry larval weight.

139 **DNA extraction and sequencing.** Five genetic lines **153, 748, 787, 802, and 805** raised  
140 on HF and HS diets were used for bacterial DNA 16S rRNA sequencing. DNA extraction,  
141 sequencing, and processing were carried out using the methods described in Bombin et al.  
142 (Bombin et al., 2020), with the following modifications. SILVA 132 Qiime release database was  
143 used as the reference database for the taxonomic assignment. Alignments were filtered by  
144 QIIME's *filter\_alignment.py* script. Reads cumulative sum scaling (CSS) normalization for alpha  
145 and beta diversities were performed through QIIME 1.91 with metagenomeSeq 1.26.1 (Paulson et  
146 al., 2013). The phylogenetic trees of ZOTUs were assembled using the default options of QIIME  
147 1.9.1 with the FastTree program (Price et al., 2009).

## 148 **Statistical Analysis**

149 **Bacterial Diversity.** Alpha diversity indices (species richness, Shannon and Simpson  
150 diversity indices) were calculated using R package *vegan* v.2.5-6 (Oksanen et al., 2009). In order  
151 to evaluate the effect of diet and treatment on alpha diversity indices, as well as pairwise  
152 difference in alpha diversities between groups of samples, we applied a linear analysis of  
153 variance model using the **aov** function (base R) and Fisher's LSD post-hoc test using DescTools  
154 v.0.99.36 (Signorell et al., 2020, Team and DC, 2019). Weighted Unifrac distances were  
155 calculated by *beta\_diversity\_through\_plots.py* script with R 3.6.1 and *Vegan* v2.4-2 package

156 (Oksanen et al., 2009). Bray-Curtis and Weighted Unifrac distances between groups were  
157 compared with permutational analysis of variance using the **anosim** function in vegan v.2.5-6  
158 with 999 permutations (Oksanen et al., 2009).

159 **Bacterial abundance.** The difference in abundance of bacterial taxa was evaluated with  
160 the Wilcoxon test as described in Bombin et al. (Bombin et al., 2020). In order to evaluate if the  
161 diets could serve as categorical predictors for classification of the larvae bacterial samples as  
162 well as to determine which of the bacterial taxa drive the differentiation of the diets, linear  
163 discriminant analysis was performed with the **lda** function in MASS v.7.3-51.4 (Venables and  
164 Ripley, 2002) at the phylum, class, order, family, and genus taxonomic levels for the 10 most  
165 abundant representatives of the taxa at each taxonomic level. The first and second linear  
166 discriminants were visualized with a ggplot2 v.3.2.1 (Wickham, 2016).

167 The correlation between bacterial abundances on each diet was evaluated with the  
168 Spearman rank correlation test as described in Bombin et al. (Bombin et al., 2020). The only  
169 exception was the analysis of sterilized larvae raised on PHSA6 due to the limitation of available  
170 samples (4). The correlations in this group were evaluated with linear regression model using the  
171 **lm** function (base R) and **glance** function from broom v.0.7.0 (Robinson, 2014). At the ZOTU  
172 level, we used a linear regression model using JMP v.15.

173 To match the sequencing data with measured larval phenotypes, we randomly assigned  
174 each phenotypic measurement within each larvae group (based on diet, treatment, and genetic  
175 line) to one of the three groups and found an average per group. The correlation coefficients and  
176 p values were calculated with a Spearman rank correlation test as described in Bombin et al.  
177 (Bombin et al., 2020). Since we were only able to obtain four sequencing samples for S larvae



178 raised on the PHSA6 diet (an insufficient sample size for Spearman's rank correlation test), we  
179 evaluated the correlations with generalized linear quasi-Poisson models with the **glm** and **anova**  
180 functions (base R). The quasi-Poisson model was selected as it fits over dispersed data better  
181 than a linear regression model (Ver Hoef and Boveng, 2007, Bombin et al., 2016).

182 **Larval phenotypes modeling:** Normality tests, data transformations, and statistical  
183 models for larval phenotypes were done with JMP Pro 15.0. Phenotype measurements were  
184 tested for normality with the Shapiro-Wilk test and an outlier box plot. All phenotypic  
185 measurements data except survival were transformed for normality (S1). The influence of a diet  
186 on phenotype development was evaluated using a standard least squares model with post hoc t-  
187 test pairwise comparisons (Bombin et al., 2020) (S1).

## 188 **RESULTS**

### 189 **Nutritional modifications influence larval bacterial community alpha and beta** 190 **diversity**

191 We were interested in whether addition of fat or sugar would lead to shifts in the bacterial  
192 community of the larvae. High dietary fat led to a significant increase in alpha diversity, assessed  
193 by Shannon's index and species richness measurements, on both the regular and autoclaved-  
194 peach diets, but only in NS larvae (S2). Conversely, addition of sugar to the R diet caused a  
195 reduction in Shannon's index (S2). Addition of fat or sugar was also associated with significant  
196 differences in beta diversity, as assessed by Bray-Curtis and weighted UniFrac distances, on both

197 the regular and peach diets (Fig. 1, Sup. Fig1, S3). However, this was only significant in

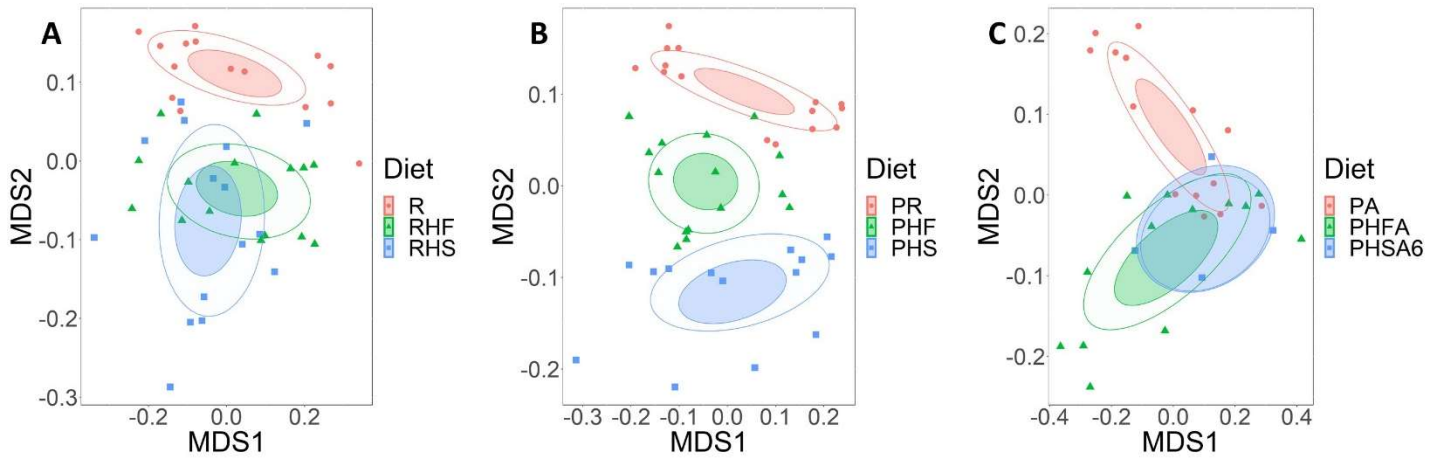

198 sterilized larvae.

199 **Figure 1: The response of bacterial community to dietary modifications varied with**  
200 **the origin of a diet.** A) Sterilized larvae raised on a R diet formed a distinct bacterial community  
201 from larvae raised on RHF and RHS diets; B) Sterilized larvae raised on a PR diet formed a  
202 distinct bacterial community from larvae raised on PHF and PHS diets; C) Sterilized larvae  
203 raised on a PA diet formed a distinct bacterial community from larvae raised on PHFA but not  
204 PHSA diets. Bray-Curtis distances were calculated based on the abundance of all identified  
205 ZOTUs and visualized with a multidimensional scaling plot.

206 **Dominant bacteria taxa are associated with nutritional modifications.**

207 Using discriminant analysis, we evaluated which of the dominant bacteria taxa influenced  
208 the differentiation of the normal diet and its HF and HS modifications, at the level of family  
209 (Fig.2) and genus (Supp. Fig 2). NS larvae raised on the RHS diet were differentiated by  
210 *Enterobacteriaceae* and *Lactobacillaceae* at the family level (Fig. 2), and *Alsitipes* and *Blautia* at  
211 the genus level (Supp. Fig 2). The RHF raised larvae were discriminated by family

212 *Bacteroidaceae* and *Corynebacteriaceae* (Fig. 2), and genus *Lachnospiraceae* NK4A136 group  
213 (Supp. Fig 2). The R diet raised larvae communities were intermediate between the RHF and the  
214 RHS diets and primarily influenced by family *Acetobacteraceae* (Fig. 2) and genus  
215 *Pseudomonas* (Supp. Fig 2). The PHF and the PHS diets were the most separated from each  
216 other (Fig. 2). The PHS diet was differentiated by family *Enterobacteriaceae* and  
217 *Lachnospiraceae* (Fig. 2) and genus *Streptococcus* (Supp. Fig 2). The PHF diet was separated by  
218 family *Erysipelotrichaceae* and *Corynebacteriaceae* (Fig. 2) and genus *Lachnospiraceae*  
219 NK4A136 and *Alistipes* (Supp. Fig 2). The PR diet community was influenced by family  
220 *Ruminococcaceae* (Fig. 2) and genus *Pseudomonas* and *Gluconobacter* (Supp. Fig 2). The PHFA  
221 diet was differentiated by *Ruminococcaceae* and *Corynebacteriaceae* (Fig. 2), and genus  
222 *Gluconobacter* (Supp. Fig 2). The PA bacterial community was differentiated by  
223 *Lachnospiraceae* (Fig. 2) and genus *Pseudomonas* (Supp. Fig 2). The PHSA6 diet was not  
224 clearly separated from the PHSA11 and the PA diets' communities at the family level, but was  
225 mostly influenced by *Lactobacillaceae*, and separated from PHSA11 by genus *Acetobacter* and  
226 *Lactobacillus*, while PHSA11 was discriminated by *Erysipelotrichaceae* (Fig. 2, Supp. Fig 2).

227 S larvae raised on the lab food-based diets were primarily defined by *Ruminococcaceae*  
228 and *Burkholderiaceae* (Fig. 2) and genus *Acetobacter* (Supp. Fig 2). The RHF diet was  
229 differentiated by *Erysipelotrichaceae* and *Muribaculaceae* (Fig. 2) and genera *Alistipes* and  
230 *Streptococcus* (Supp. Fig 2). The RHS was separated by *Enterobacteriaceae* and *Lachnospiraceae*  
231 (Fig. 2) and genus *Blautia* (Supp. Fig 2). The PR diet was differentiated by *Lachnospiraceae*,  
232 *Burkholderiaceae*, and *Acetobacteraceae* (Fig. 2), and genus *Acetobacter* (Supp. Fig 2). The  
233 PHF food raised larvae were separated by *Muribaculaceae* and *Corynebacteriaceae* (Fig. 2) and  
234 genus *Corynebacterium* 1 (Supp. Fig 2). The PHS diet was defined by *Ruminococcaceae*,

235 *Enterobacteriaceae*, and *Lactobacillaceae* (Fig. 2), and genera *Lactobacillus* and *Gluconobacter*.  
 236 For the autoclaved diets, PA was defined by *Acetobacteraceae*, *Muribaculaceae*, and  
 237 *Burkholderiaceae* (Fig. 2), and genera *Streptococcus* and *Acetobacter* (Supp. Fig 2). The PHFA  
 238 diet was defined by *Corynebacteriaceae* and *Erysipelotrichaceae* (Fig. 2), and genera  
 239 *Corynebacterium 1* and *Lachnospiraceae NK4A136* (Supp. Fig 2). The PHSA6 diet was  
 240 separated by *Enterobacteriaceae* and *Lactobacillaceae* (Fig. 2), and genera *Lactobacillus* and  
 241 *Alistipes* (Supp. Fig 2). Furthermore, dominant bacteria taxa were influential in separating  
 242 normal and modified diets at all taxonomic ranks (Supp. Fig 3-5).

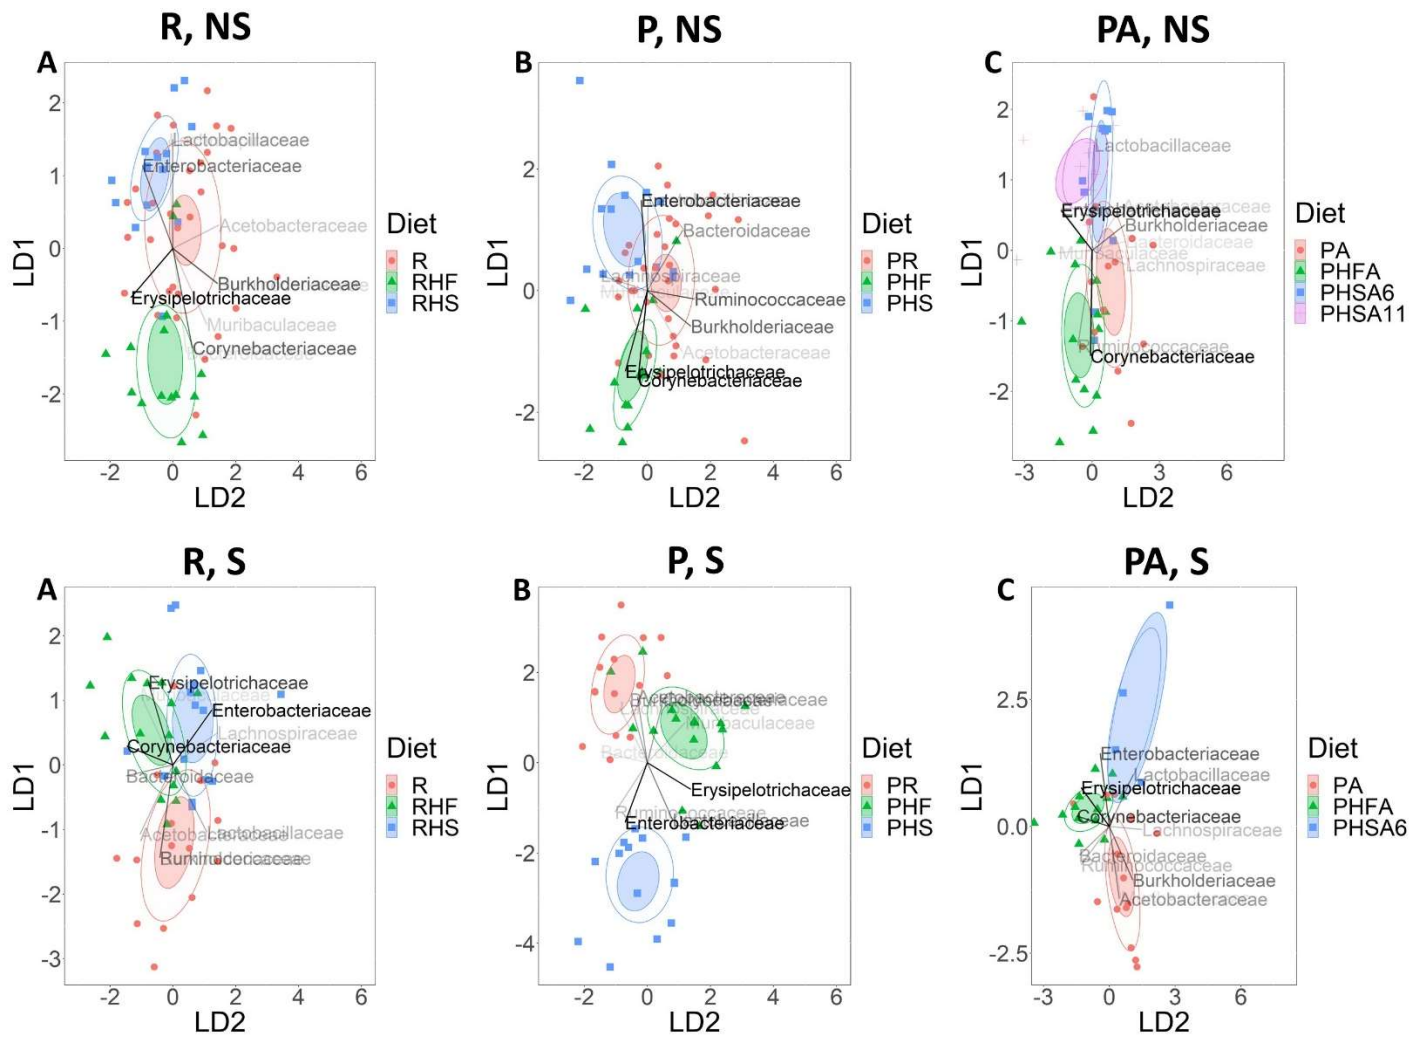

243

244 **Figure 2: Nutritional modifications cause shifts in bacterial composition and are**  
245 **associated with changes in abundance of the dominant bacteria families.** Linear discriminant  
246 analysis of 10 dominant bacterial taxa. A) Non-sterilized larvae raised on lab-based diets; B)  
247 Non-sterilized larvae raised on peach-based diets; C) Non-sterilized larvae raised on autoclaved  
248 peach-based diets; D) Sterilized larvae raised on lab-based diets; E) Sterilized larvae raised on  
249 peach-based diets; F) Sterilized larvae raised on autoclaved peach-based diets. The intensity of  
250 vector rays' color corresponds to the strength of the impact that it produced on the samples to be  
251 separated in the vector direction, on a canonical plot. Confidence ellipses are filled based on the  
252 color of the diet. Normal data ellipses are unfilled and leveled to include 50% of the samples.

253 **Larval response to nutritional modification varies between lab-based and peach-**  
254 **based diets.**

255 On a lab diet, addition of extra fats increased larval triglyceride and glucose  
256 concentrations but decreased larval weight and protein concentration (Fig. 3, Fig. 4, S4). On a  
257 peach diet, the presence of additional lipids decreased larval survival, weight, and glucose  
258 concentrations (Fig. 3, Fig. 4, S4). The addition of extra fat to the PA diet decreased survival and  
259 development time (Fig. 3, Fig. 4, S4). In addition, sterilized larvae raised on the PHFA diet  
260 exhibited higher triglyceride and protein concentrations, but lower glucose concentration  
261 compared with the PA food raised larvae (Fig. 3, Fig. 4, S4).

262 Addition of extra sugar to the lab diet decreased larval weight (Fig. 5, Fig. 6, S4). In  
263 addition, it increased triglyceride concentrations for sterilized larvae and decreased protein levels  
264 for non-sterilized larvae (Fig. 5, Fig. 6, S4). HS modification of the peach diet resulted in a  
265 reduction of larval survival, longer development time, higher triglyceride and glucose

266 concentrations (Fig. 5, Fig. 6). In addition, non-sterilized larvae raised on a PR diet were heavier  
267 than larvae raised on a PHS diet (Fig. 5, Fig. 6). Larvae raised on a PHSA6 diet developed faster,  
268 had higher weight, and glucose concentrations, but lower protein concentrations compared with  
269 PA raised larvae (Fig. 5, Fig. 6, S4). Interestingly, more sterilized larvae survived on the PA diet  
270 compared with PHSA6 diet, while opposite was true for non-sterilized larvae (Fig. 5, Fig. 6, S4).  
271 In addition, sterilized larvae raised on PHSA11 diet exhibited lower survival, development time,  
272 and protein concentrations, but higher weight (Fig. 5, Fig. 6, S4). Non-sterilized larvae raised on  
273 PHSA11 diet had longer development time, higher glucose concentration, and lower protein  
274 concentration, when compared with PA raised larvae (Fig. 5, Fig. 6, S4).

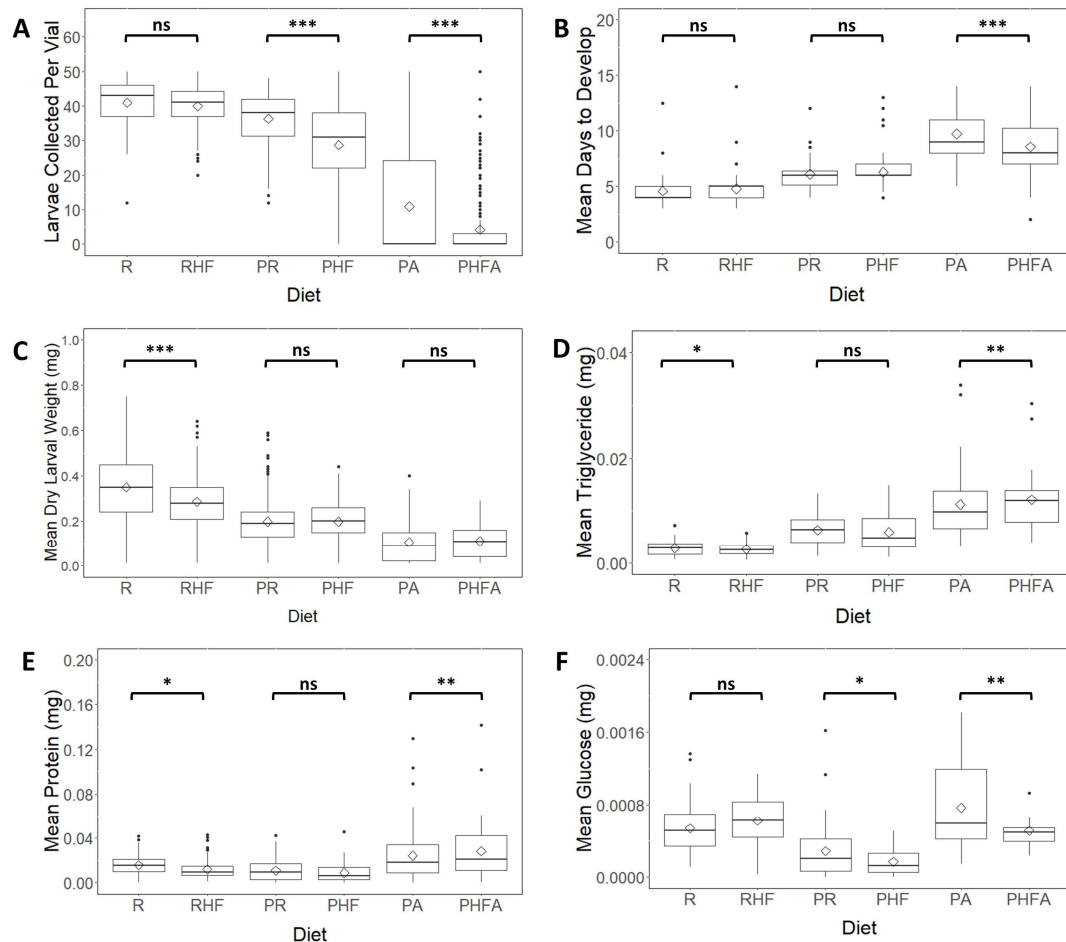

276           **Figure 3: The response to high fat modification varies between sterilized larvae**  
277 **raised on peach-based and lab-based diets for most of the measured phenotypes.** A) HF  
278 modification caused a decrease in mean survival until the 3<sup>rd</sup> instar stage on peach-based diets;  
279 B) HF modification caused a decrease in larval development time only on a peach-based  
280 autoclaved diet; C) HF modification caused a decrease in larval weights on a lab-based diet only;  
281 D) HF modification caused an increase in larval triglyceride concentrations only on lab-based  
282 and autoclaved peach-based diets; E) HF modification caused a decrease in larval protein  
283 concentrations on a lab-based diet but an increase in protein levels on an autoclaved peach-based  
284 diet; F) HF modification caused a decrease in larval glucose concentrations only on the peach-  
285 based diets. Crossbars indicate the median, and rhombus indicate the mean. Asterisks indicate  
286 the significance of comparisons  $p < 0.001$  \*\*\*,  $p < 0.01$  \*\*,  $p < 0.05$  \*, and ns  $p \geq 0.05$ .

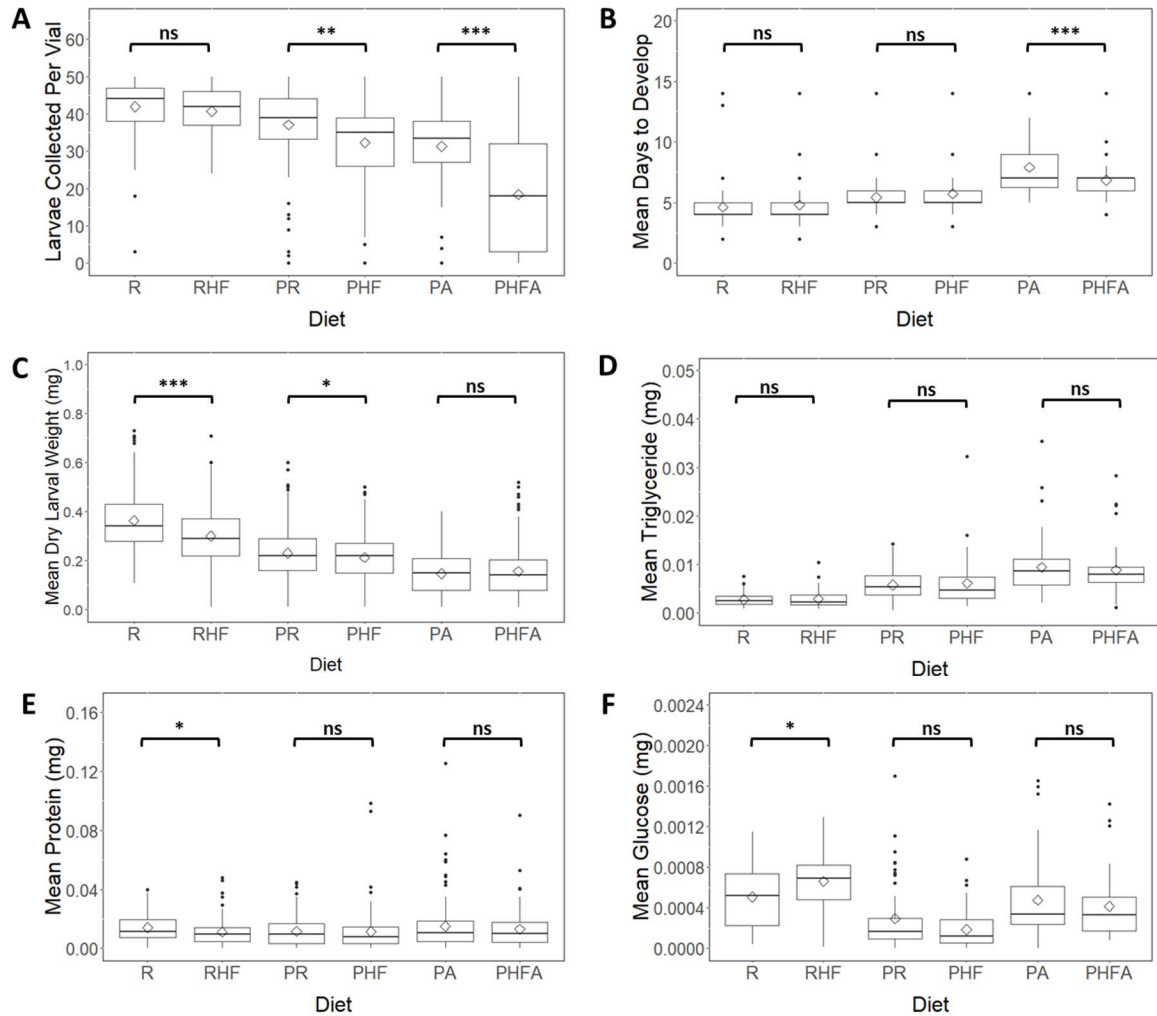

287

288 **Figure 4: The response of non-sterilized larvae to high fat modification varies with a**

289 **diet for most of the tested phenotypes A) HF modification caused a decrease in mean survival**

290 **until the 3rd instar stage on peach based diets; B) HF modification caused a decrease in larval**

291 **development time only on a peach autoclaved diet; C) HF modification caused a decrease in**

292 **larval weights on lab and regular peach diets; D) HF modification did not produce a significant**

293 **effect on larval triglyceride levels; E) HF modification caused a decrease in larval protein**

294 **concentrations only on a lab diet; F) HF modification caused an increase in larval glucose**

295 **concentrations only on the lab diet. Asterisks indicate the significance of comparisons  $p < 0.001$**



296 \*\*\*,  $p < 0.01$  \*\*,  $p < 0.05$  \*, and ns  $p \geq 0.05$ . Crossbars indicate the median, and rhombus  
297 indicate the mean.

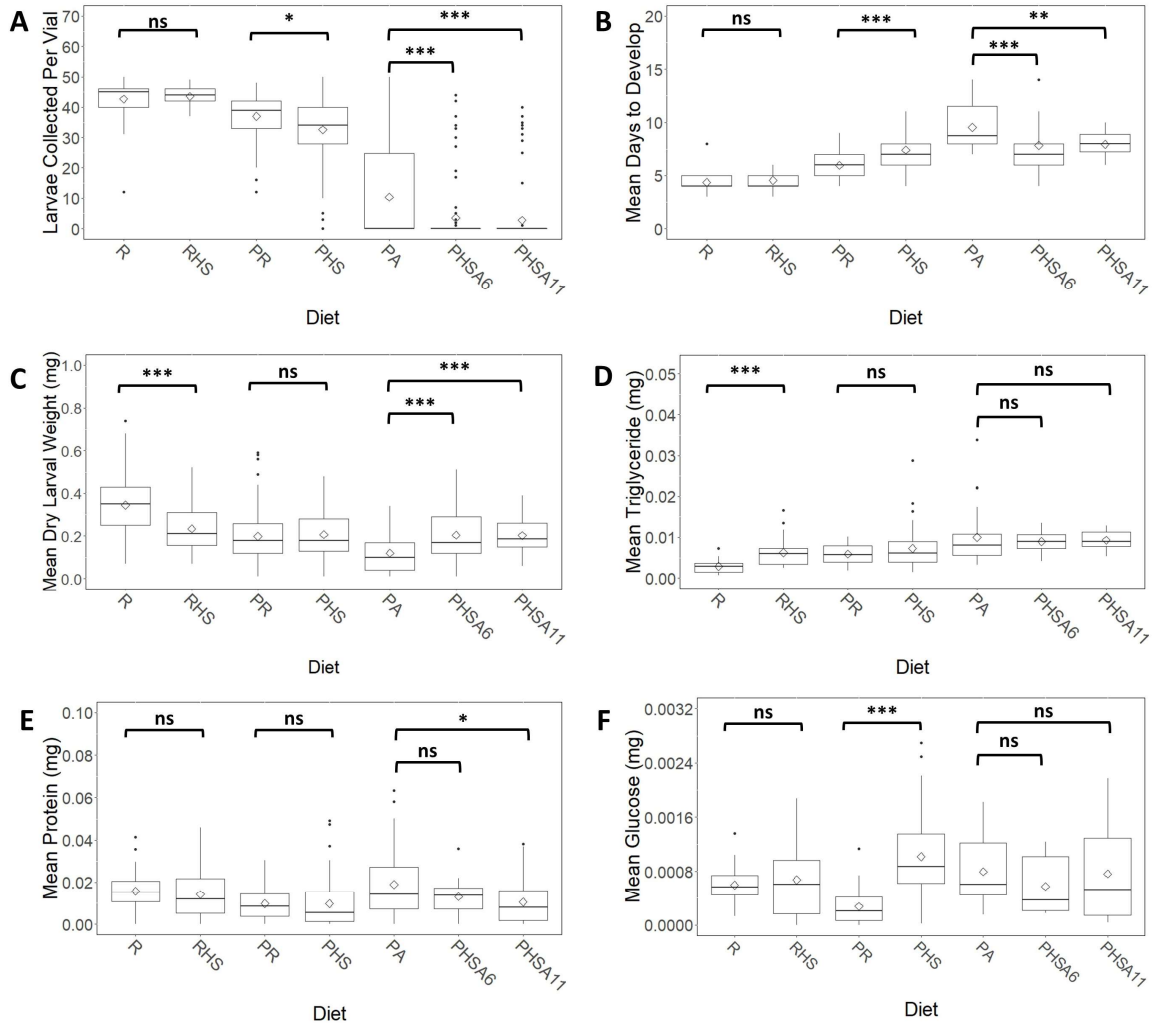

298

299 **Figure 5: Sterilized larvae raised on lab-based and peach-based diet exhibit a**  
300 **different response to high sugar nutritional modification, for most of the measured**  
301 **phenotypes.** A) HS modification caused a decrease in mean survival until the 3<sup>rd</sup> instar stage on  
302 peach-based diets; B) HS modification caused an increase in development time only on a peach-  
303 based diet; C) HS modification caused a decrease in larval weights only on a lab-based diet; D)  
304 HS modification caused an increase in triglyceride concentrations only on a lab-based diet; E)

305 HS modification caused a decrease in larval protein concentrations only on an autoclaved peach-  
306 based diet; F) HS modification caused an increase in larval glucose concentrations only on a  
307 peach-based diet. Crossbars indicate the median, and rhombus indicate the mean. Asterisks  
308 indicate the significance of comparisons  $p < 0.001$  \*\*\*,  $p < 0.01$  \*\*,  $p < 0.05$  \*, and ns  $p \geq 0.05$ .

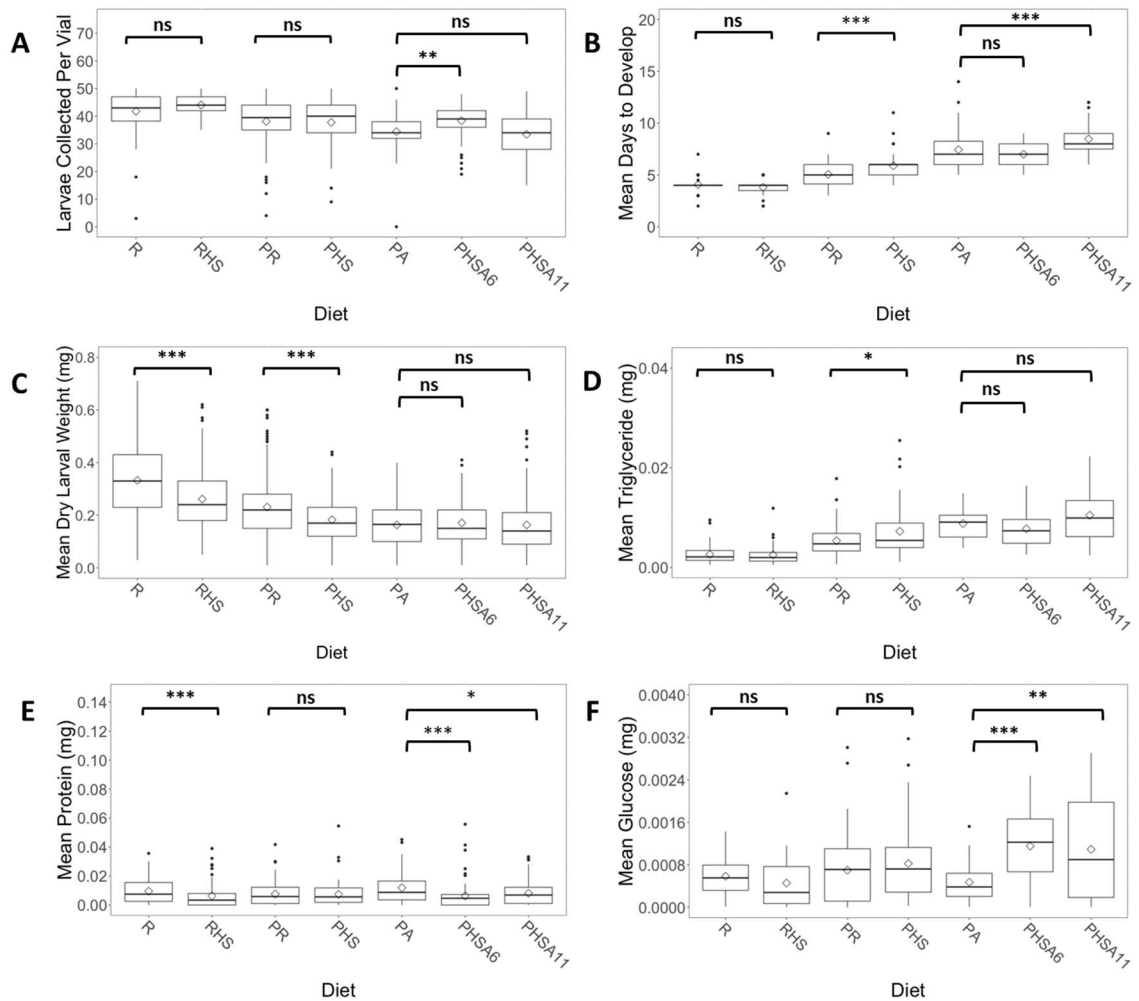

309

310 **Figure 6: The response of non-sterilized larvae to high sugar modification varies**

311 **with a diet.** A) HS modification increased larval survival only on a PHSA6 diet; B) HS

312 modification increased larval development time on most of the peach-based diets. C) HS

313 modification decreased larval weight on a lab and peach diets; D) HS modification increased

314 larval triglyceride levels only on a peach diet; E) Protein concentrations of only larvae that were  
315 raised on a peach diet did not change significantly due to HS modification; F) Glucose  
316 concentrations of the larvae raised on PA diet significantly increased due to HS modification of  
317 the diet. Crossbars indicate the median, and rhombus indicate the mean. Asterisks indicate the  
318 significance of comparisons  $p < 0.001$  \*\*\*,  $p < 0.01$  \*\*,  $p < 0.05$  \*, and ns  $p \geq 0.05$ .

## 319 **DICSCUSSION**

### 320 **Bacterial community composition varies with larval diets.**

321 A very limited number of studies that compared *Drosophila* gut bacterial communities in  
322 response to HF or HS modifications of the diet are currently available. Von Frieling et. al (2020)  
323 suggested that HF bacterial community is distinct from the normal diet. Jehrke et. al (Jehrke et  
324 al., 2018) did not observe substantial differences in the structure of the whole bacterial  
325 communities of normal and HS diets. In our work, largely, standard and modified diets exhibited  
326 a significant difference in the community structure and phylogenetic diveristy as was indicated  
327 by Bray-Curtis and Unifrac distances, especially if larvae were sterilized. Comparing normal and  
328 modified diets, we observed that HF diets were more similar in their taxonomic diversity to  
329 normal diets than were HS diets, particularly for sterilized larvae. Considering vertebrate models,  
330 previous research indicated that mice and rats fed on HF and HS diets formed bacterial  
331 communities that were distinct from ones feeding on a normal diet (von Frieling et al., 2020, Do  
332 et al., 2018). As described above, we observed similar patterns in our data, especially for  
333 sterilized larvae, suggesting that macronutrient content is an important determinant of bacterial  
334 community structure.

### 335 **Abundances of the dominant bacteria taxa are associated with diet types.**

336           Among the dominant bacteria groups, we also noticed several taxa that were consistently  
337 associated with certain diet modifications. HF diets were associated with Actinobacteria and  
338 Bacteroidetes at the phylum level, Corynebacteriales and Erysipelotrichales at the order level,  
339 *Corynebacteriaceae* and *Erysipelotrichaceae* at the family level, and *Corynebacterium 1* and  
340 *Lachnospiraceae NK4A136* group at the genera level. Several representatives of  
341 *Corynebacterium* are known to be members of symbiotic microbiota of vertebrates, exhibit  
342 lipophilic qualities, and produce lipolytic enzymes (Hahne et al., 2018). In our work,  
343 *Corynebacteriaceae* was negatively correlated with the glucose concentrations on RHF and PHF  
344 diets. *Corynebacterium 1* was negatively correlated with glucose concentrations, on the same  
345 diets. *Corynebacterium* (a different taxon from *Corinabacterium 1*) was positively correlated  
346 with glucose on PHFA and negatively correlated with glucose on PHF diet. Previous research  
347 indicated an increase in the abundance of *Erysipelotrichaceae* in mice fed a high fat diet  
348 (Kaakoush, 2015). *Erysipelotrichaceae* was also shown to be associated with host lipid  
349 metabolism and dyslipidemic phenotype (Martínez et al., 2013). In our work, we observed  
350 positive correlations between *Erysipelotrichaceae* and triglyceride concentrations and the  
351 development rate on PHF diet and glucose concentrations on PHFA diet. *Lachnospiraceae* was  
352 also shown to be correlated with high-fat diets, altered lipid metabolism and obesity in humans  
353 and animal models (Vacca et al., 2020). In our work, *Lachnospiraceae* was positively correlated  
354 with glucose concentrations on PHFA diet.

355           HS diets were associated with Tenericutes and Firmicutes at the phylum level,  
356 Lactobacillales and Enterobacteriales at the order level, *Enterobacteriaceae* and  
357 *Lactobacillaceae* at the family level, and *Lactobacillus* at the genus. *Lactobacillus* is known to  
358 produce glycoside hydrolases and polysaccharide lyases which can degrade carbohydrates

359 (Wang et al., 2020). Previous research showed that *Lactobacillaceae* abundances were increased  
360 in honeybees that were fed a sucrose solution; the same carbohydrate that we used in order to  
361 make HS diets (Wang et al., 2020). *Lactobacillus* strains are known to be a part of human  
362 microbiota and were correlated with a decrease in fasting glucose sugar and insulin resistance  
363 (Azad et al., 2018, Khalili et al., 2019). Mice that were fed by high sucrose diet were shown to  
364 have higher abundances of *Lactobacillus* than mice fed on a normal diet (Magnusson et al.,  
365 2015). The survival of ingested *Lactobacillus plantarum* was shown to be improved upon  
366 feeding on high fat high sugar diets (Yin et al., 2017). In our work, on HS diets, we observed that  
367 *Lactobacillaceae* was positively correlated with total number of larvae and development rate on  
368 PHS diet and negatively correlated with protein and triglyceride concentrations on RHS diet.  
369 *Lactobacillus* was positively correlated with the total number of larvae and development rate on  
370 PHS diet. In addition, a negative correlation was observed with weight on a PHS diet and protein  
371 and triglyceride concentrations on a RHS diet. *Enterobacteriaceae* and other members of  
372 Protobacteria are known for their ability to utilize simple carbohydrates rapidly and for being  
373 associated with a high sugar diet (Satokari, 2020, Volynets et al., 2017, Park et al., 2013,  
374 Magnusson et al., 2015). In addition, *Enterobacteriaceae* were shown to be correlated with the  
375 obese phenotype (Xiao et al., 2014). In our work, *Enterobacteriaceae* was negatively correlated  
376 with triglyceride concentrations on PHS diet, positively correlated with development rate on  
377 PHS and larvae survival on PHS and PHSA6 diets. These findings suggest that several symbiotic  
378 taxa have similar associations with multiple host organisms. Therefore, these relations might be  
379 evolutionarily conserved.

380           The regular lab diet was also consistently associated with certain bacterial taxa, such as  
381 Virrumicrobia and Epsilonobacteria at the phylum level, Pseudomanales and Acetobacterales at

382 the order level, *Acetobacteraceae* and *Burkholderiaceae* at the family level, and *Pseudomonas*  
383 and *Acetobacter* (mostly for sterilized larvae). Members of *Acetobacteraceae* family are known  
384 to be a part of normal *Drosophila* microbiota in the lab and wild flies (Vandehoef et al., 2020,  
385 Han et al., 2017, Bost et al., 2018, Winans et al., 2017). In our previous work, we observed that  
386 on unmodified diets, *Acetobacteraceae* was negatively correlated with triglyceride  
387 concentrations on the PA and the PR diets, positively correlated with weight on the PA and on  
388 the PR diets and positively correlated with development time on the PR diet (Bombin et al.,  
389 2020). Moreover, *Acetobacter* was positive correlated with weight on the PA and the PR diets  
390 and development time on the PR diet (Bombin et al., 2020). Several members of  
391 *Burkholderiaceae* and *Pseudomonas* are known to be pathogens in *Drosophila* (Vodovar et al.,  
392 2005, Pilátová and Dionne, 2012, D'Argenio et al., 2001). Our previous work found a negative  
393 correlation between *Burkholderiaceae* and weight on the PR diet and larvae development time on  
394 the R diet (Bombin et al., 2020). *Pseudomonas* was negatively correlated with the total number  
395 of larvae on R diet as well as development time and weight on a PR diet (Bombin et al., 2020).  
396 Triglyceride concentrations on PR diet and development time on PA diet were positively  
397 correlated with the abundance of *Pseudomonas* (Bombin et al., 2020).

398 **Symbiotic microbiota may alleviate some of the negative effects produced by**  
399 **harmful dietary modifications.**

400 On the modified peach diets, presence of symbiotic microbiota reduced the mortality and  
401 development time of the larvae. This is consistent with previous research showing that the  
402 parental microbiota helps larvae to adapt to nutritionally unfavorable conditions (Bing et al.,  
403 2018, Berger et al., 2005, Henry et al., 2020b). Similarly, high pre-adult mortality of flies and

404 increased development time was shown on a high sugar low-yeast diet, especially when  
405 symbiotic microbiota was removed (Wong et al., 2014, Henry et al., 2020b).

406 Consistent with our previous work, diets that supported higher development and survival  
407 rates also generally supported higher weights and lower triglyceride concentrations of the larvae  
408 (Bombin et al., 2020). It was shown that an increase in sugar and fat concentrations may cause a  
409 decrease in larvae weights and increase in triglyceride concentrations (Reed et al., 2010,  
410 Musselman et al., 2011, Jehrke et al., 2018, Galenza et al., 2016, Wong et al., 2015). In our  
411 work, presence of environmental and parental microbiota often reduced the negative effect of  
412 diet modification on larval weight and triglyceride concentrations. However, sterilized larvae  
413 raised on autoclaved peach diets, especially with harmful modifications exhibited extremely low  
414 survival rate and mostly were sampled from two genetic lines. That complicated the evaluation  
415 of a general pattern for metabolic phenotypes and suggested a presence of genetic adaptations in  
416 those *Drosophila* lines.

417 Consistent with our previous findings, the glucose and protein concentrations in larvae  
418 did not directly correlate with life history traits (Bombin et al., 2020). Previous research  
419 indicated that a high sugar diet may cause increased glucose concentrations in *Drosophila* and  
420 vertebrate models (Galenza et al., 2016, Do et al., 2018, Jehrke et al., 2018, Wong et al., 2014).  
421 We found similar results for sterilized larvae raised on peach-based diet and for non-sterilized  
422 larvae raised on autoclaved peach-based diets. Although Galenza et. al (2016) and Jehrke et. al  
423 (2018) reported no significant correlations between increased sugars consumption and protein  
424 concentrations; on the natural diet, we observed that presence of symbiotic microbiota can  
425 alleviate a reduction in larval protein concentration caused by the high sugar diet. In addition,

426 our results indicated that presence of symbiotic microbiota reduces the difference in glucose and  
427 protein concentrations caused by addition of extra lipids to a peach diet.

428 **Conclusions.** Consumption of high fat and high sugar diets is often associated with a  
429 development of unhealthy metabolic phenotype and obesity (Seganfredo et al., 2017, Patterson et  
430 al., 2016, Al-Goblan et al., 2014). We observed that nutritional modifications of the diets are  
431 associated with shifts in gut bacterial community composition. Interestingly, the dominant  
432 bacteria taxa associated with particular nutritional modification (high fat or high sugar), in our  
433 *Drosophila* model are similar with bacterial community members associated with westernized  
434 diet, in vertebrate models, and human populations. Microbiota acquired from the environment or  
435 inherited maternally are capable of reducing negative metabolic effects, caused by nutritional  
436 modification of a diet, especially on peach-based diets.

## 437 REFERENCES

- 438
- 439 AL-GOBLAN, A. S., AL-ALFI, M. A., KHAN, M. Z. J. D., METABOLIC SYNDROME, TARGETS, O. & THERAPY  
440 2014. Mechanism linking diabetes mellitus and obesity. 7, 587.
- 441 AZAD, M., KALAM, A., SARKER, M., LI, T. & YIN, J. J. B. R. I. 2018. Probiotic species in the modulation of  
442 gut microbiota: an overview. 2018.
- 443 BERGER, Z., TFOFI, E. K., MICHEL, C. H., PASCO, M. Y., TENANT, S., RUBINSZTEIN, D. C. & O'KANE, C. J. J.  
444 H. M. G. 2005. Lithium rescues toxicity of aggregate-prone proteins in *Drosophila* by perturbing  
445 Wnt pathway. 14, 3003-3011.
- 446 BING, X., GERLACH, J., LOEB, G. & BUCHON, N. 2018. Nutrient-dependent impact of microbes on  
447 *Drosophila suzukii* development. *MBio*, 9, e02199-17.
- 448 BIRSE, R. T., CHOI, J., REARDON, K., RODRIGUEZ, J., GRAHAM, S., DIOP, S., OCORR, K., BODMER, R. &  
449 OLDHAM, S. 2010. High-fat-diet-induced obesity and heart dysfunction are regulated by the TOR  
450 pathway in *Drosophila*. *Cell metabolism*, 12, 533-544.
- 451 BOMBIN, A., CUNNEELY, O., EICKMAN, K., BOMBIN, S., RUESY, A., SU, M., MYERS, A., COWAN, R. & REED,  
452 L. J. M. 2020. Influence of Lab Adapted Natural Diet and Microbiota on Life History and  
453 Metabolic Phenotype of *Drosophila melanogaster*. 8, 1972.
- 454 BOMBIN, A., REED, L. K. J. E. & EVOLUTION 2016. The changing biodiversity of Alabama *Drosophila*:  
455 important impacts of seasonal variation, urbanization, and invasive species. 6, 7057-7069.
- 456 BOST, A., FRANZENBURG, S., ADAIR, K. L., MARTINSON, V. G., LOEB, G. & DOUGLAS, A. E. 2018. How gut  
457 transcriptional function of *Drosophila melanogaster* varies with the presence and composition  
458 of the gut microbiota. *Molecular ecology*, 27, 1848-1859.



- 459 BRADFORD, M. M. 1976. A rapid and sensitive method for the quantitation of microgram quantities of  
460 protein utilizing the principle of protein-dye binding. *Analytical biochemistry*, 72, 248-254.
- 461 CHANDLER, J. A., LANG, J. M., BHATNAGAR, S., EISEN, J. A. & KOPP, A. 2011. Bacterial communities of  
462 diverse *Drosophila* species: ecological context of a host–microbe model system. *PLoS genetics*,  
463 7, e1002272.
- 464 CLARK, A. & KEITH, L. J. G. 1988. Variation among extracted lines of *Drosophila melanogaster* in  
465 triacylglycerol and carbohydrate storage. 119, 595-607.
- 466 D'ARGENIO, D. A., GALLAGHER, L. A., BERG, C. A. & MANOIL, C. J. J. O. B. 2001. *Drosophila* as a Model  
467 Host for *Pseudomonas aeruginosa* Infection. 183, 1466-1471.
- 468 DE LUCA, M., YI, N., ALLISON, D. B., LEIPS, J. & RUDEN, D. M. J. O. R. 2005. Mapping quantitative trait loci  
469 affecting variation in *Drosophila* triacylglycerol storage. 13, 1596-1605.
- 470 DEW-BUDD, K., JARNIGAN, J. & REED, L. K. 2016. Genetic and sex-specific transgenerational effects of a  
471 high fat diet in *Drosophila melanogaster*. *PLoS one*, 11, e0160857.
- 472 DO, M. H., LEE, E., OH, M.-J., KIM, Y. & PARK, H.-Y. J. N. 2018. High-glucose or-fructose diet cause  
473 changes of the gut microbiota and metabolic disorders in mice without body weight change. 10,  
474 761.
- 475 DOBSON, A. J., CHASTON, J. M., NEWELL, P. D., DONAHUE, L., HERMANN, S. L., SANNINO, D. R.,  
476 WESTMILLER, S., WONG, A. C.-N., CLARK, A. G. & LAZZARO, B. P. 2015. Host genetic  
477 determinants of microbiota-dependent nutrition revealed by genome-wide analysis of  
478 *Drosophila melanogaster*. *Nature communications*, 6, 6312.
- 479 GALENZA, A., HUTCHINSON, J., CAMPBELL, S. D., HAZES, B. & FOLEY, E. 2016. Glucose modulates  
480 *Drosophila* longevity and immunity independent of the microbiota. *Biology open*, 5, 165-173.
- 481 HAHNE, J., KLOSTER, T., RATHMANN, S., WEBER, M. & LIPSKI, A. J. P. O. 2018. Isolation and  
482 characterization of *Corynebacterium* spp. from bulk tank raw cow's milk of different dairy farms  
483 in Germany. 13, e0194365.
- 484 HAN, G., LEE, H. J., JEONG, S. E., JEON, C. O. & HYUN, S. 2017. Comparative Analysis of *Drosophila*  
485 *melanogaster* Gut Microbiota with Respect to Host Strain, Sex, and Age. *Microbial ecology*, 74,  
486 207-216.
- 487 HAN, T. S. & LEAN, M. E. 2016. A clinical perspective of obesity, metabolic syndrome and cardiovascular  
488 disease. *JRSM cardiovascular disease*, 5, 2048004016633371.
- 489 HENRY, Y., OVERGAARD, J., COLINET, H. J. C. B., MOLECULAR, P. P. A. & PHYSIOLOGY, I. 2020a. Dietary  
490 nutrient balance shapes phenotypic traits of *Drosophila melanogaster* in interaction with gut  
491 microbiota. 241, 110626.
- 492 HENRY, Y., TARAPACKI, P. & COLINET, H. J. F. M. E. 2020b. Larval density affects phenotype and  
493 surrounding bacterial community without altering gut microbiota in *Drosophila melanogaster*.  
494 96, f1aa055.
- 495 HUANG, J.-H. & DOUGLAS, A. E. 2015. Consumption of dietary sugar by gut bacteria determines  
496 *Drosophila* lipid content. *Biology letters*, 11, 20150469.
- 497 HUANG, W., MASSOURAS, A., INOUE, Y., PEIFFER, J., RÀMIA, M., TARONE, A. M., TURLAPATI, L.,  
498 ZICHNER, T., ZHU, D. & LYMAN, R. F. 2014. Natural variation in genome architecture among 205  
499 *Drosophila melanogaster* Genetic Reference Panel lines. *Genome research*, 24, 1193-1208.
- 500 JEHRKE, L., STEWART, F. A., DROSTE, A. & BELLER, M. 2018. The impact of genome variation and diet on  
501 the metabolic phenotype and microbiome composition of *Drosophila melanogaster*. *Scientific*  
502 *reports*, 8, 1-15.
- 503 KAAKOUSH, N. O. 2015. Insights into the role of Erysipelotrichaceae in the human host. *Frontiers in*  
504 *cellular*  
505 *infection microbiology*

506 5, 84.  
507 KAUR, J. 2014. A comprehensive review on metabolic syndrome. *Cardiology research and practice*, 2014.  
508 KHALILI, L., ALIPOUR, B., JAFAR-ABADI, M. A., FARAJI, I., HASSANALILOU, T., ABBASI, M. M., VAGHEF-  
509 MEHRABANY, E. & SANI, M. A. J. I. B. J. 2019. The effects of lactobacillus casei on glycemic  
510 response, serum sirtuin1 and fetuin-a levels in patients with type 2 diabetes mellitus: a  
511 randomized controlled trial. 23, 68.  
512 KREZNAR, J. H., KELLER, M. P., TRAEGER, L. L., RABAGLIA, M. E., SCHUELER, K. L., STAPLETON, D. S.,  
513 ZHAO, W., VIVAS, E. I., YANDELL, B. S. & BROMAN, A. T. J. C. R. 2017. Host genotype and gut  
514 microbiome modulate insulin secretion and diet-induced metabolic phenotypes. 18, 1739-1750.  
515 LEITÃO-GONÇALVES, R., CARVALHO-SANTOS, Z., FRANCISCO, A. P., FIOREZE, G. T., ANJOS, M., BALTAZAR,  
516 C., ELIAS, A. P., ITSKOV, P. M., PIPER, M. D. & RIBEIRO, C. 2017. Commensal bacteria and  
517 essential amino acids control food choice behavior and reproduction. *PLoS biology*, 15,  
518 e2000862.  
519 MACKAY, T. F., RICHARDS, S., STONE, E. A., BARBADILLA, A., AYROLES, J. F., ZHU, D., CASILLAS, S., HAN,  
520 Y., MAGWIRE, M. M. & CRIDLAND, J. M. 2012. The Drosophila melanogaster genetic reference  
521 panel. *Nature*, 482, 173-178.  
522 MAGNUSSON, K., HAUCK, L., JEFFREY, B., ELIAS, V., HUMPHREY, A., NATH, R., PERRONE, A. &  
523 BERMUDEZ, L. J. N. 2015. Relationships between diet-related changes in the gut microbiome  
524 and cognitive flexibility. 300, 128-140.  
525 MAIR, W., PIPER, M. D. & PARTRIDGE, L. 2005. Calories do not explain extension of life span by dietary  
526 restriction in Drosophila. *PLoS biology*, 3, e223.  
527 MARTÍNEZ, I., PERDICARO, D. J., BROWN, A. W., HAMMONS, S., CARDEN, T. J., CARR, T. P., ESKRIDGE, K.  
528 M., WALTER, J. J. A. & MICROBIOLOGY, E. 2013. Diet-induced alterations of host cholesterol  
529 metabolism are likely to affect the gut microbiota composition in hamsters. 79, 516-524.  
530 MENDEZ, S., WATANABE, L., HILL, R., OWENS, M., MORACZEWSKI, J., ROWE, G. C., RIDDLE, N. C. & REED,  
531 L. K. 2016. The TreadWheel: a novel apparatus to measure genetic variation in response to  
532 gently induced exercise for Drosophila. *PloS one*, 11, e0164706.  
533 MOGHADAM, N. N., HOLMSTRUP, M., MANENTI, T., MOURIDSEN, M. B., PERTOLDI, C. & LOESCHCKE, V.  
534 2015. The role of storage lipids in the relation between fecundity, locomotor activity, and  
535 lifespan of drosophila melanogaster longevity-selected and control lines. *PloS one*, 10,  
536 e0130334.  
537 MUSSELMAN, L. P., FINK, J. L., NARZINSKI, K., RAMACHANDRAN, P. V., HATHIRAMANI, S. S., CAGAN, R. L.  
538 & BARANSKI, T. J. 2011. A high-sugar diet produces obesity and insulin resistance in wild-type  
539 Drosophila. *Disease models & mechanisms*, 4, 842-849.  
540 NEWELL, P. D. & DOUGLAS, A. E. 2014. Interspecies interactions determine the impact of the gut  
541 microbiota on nutrient allocation in Drosophila melanogaster. *Applied and environmental*  
542 *microbiology*, 80, 788-796.  
543 OKSANEN, J., KINDT, R., LEGENDRE, P., O'HARA, B., SIMPSON, G., SOLYMOS, P., STEVENS, M. &  
544 WAGNER, H. 2009. vegan: community ecology package. R package version 1.15-4. R Foundation  
545 for Statistical Computing, Vienna, Austria.  
546 ORG, E., PARKS, B. W., JOO, J. W. J., EMERT, B., SCHWARTZMAN, W., KANG, E. Y., MEHRABIAN, M., PAN,  
547 C., KNIGHT, R. & GUNSALUS, R. J. G. R. 2015. Genetic and environmental control of host-gut  
548 microbiota interactions. 25, 1558-1569.  
549 PARK, D.-Y., AHN, Y.-T., HUH, C.-S., MCGREGOR, R. A. & CHOI, M.-S. J. W. J. O. G. W. 2013. Dual probiotic  
550 strains suppress high fructose-induced metabolic syndrome. 19, 274.  
551 PATTERSON, E., RYAN, P. M., CRYAN, J. F., DINAN, T. G., ROSS, R. P., FITZGERALD, G. F. & STANTON, C.  
552 2016. Gut microbiota, obesity and diabetes. *Postgraduate medical journal*, postgradmedj-2015-  
553 133285.

- 554 PAULSON, J. N., STINE, O. C., BRAVO, H. C. & POP, M. 2013. Differential abundance analysis for microbial  
555 marker-gene surveys. *Nature methods*, 10, 1200.
- 556 PILÁTOVÁ, M. & DIONNE, M. S. J. P. O. 2012. Burkholderia thailandensis is virulent in Drosophila  
557 melanogaster. 7, e49745.
- 558 PRICE, M. N., DEHAL, P. S., ARKIN, A. P. J. M. B. & EVOLUTION 2009. FastTree: computing large minimum  
559 evolution trees with profiles instead of a distance matrix. 26, 1641-1650.
- 560 REED, L. K., WILLIAMS, S., SPRINGSTON, M., BROWN, J., FREEMAN, K., DESROCHES, C. E., SOKOLOWSKI,  
561 M. B. & GIBSON, G. 2010. Genotype-by-diet interactions drive metabolic phenotype variation in  
562 Drosophila melanogaster. *Genetics*, 185, 1009-1019.
- 563 ROBINSON, D. J. A. P. A. 2014. broom: An R package for converting statistical analysis objects into tidy  
564 data frames.
- 565 SATOKARI, R. 2020. High Intake of Sugar and the Balance between Pro-and Anti-Inflammatory Gut  
566 Bacteria. Multidisciplinary Digital Publishing Institute.
- 567 SEGANFREDO, F., BLUME, C., MOEHLECKE, M., GIONGO, A., CASAGRANDE, D., SPOLIDORO, J., PADOIN,  
568 A., SCHAAN, B. & MOTTIN, C. 2017. Weight-loss interventions and gut microbiota changes in  
569 overweight and obese patients: a systematic review. *Obesity Reviews*.
- 570 SIGNORELL, A., AHO, K., ALFONS, A., ANDEREGG, N., ARAGON, T., ARPPE, A., BADDELEY, A., BARTON, K.,  
571 BOLKER, B. & BORCHERS, H. 2020. DescTools: tools for descriptive statistics. R package version  
572 0.99. 34.
- 573 SKORUPA, D. A., DERVISEFENDIC, A., ZWIENER, J. & PLETCHER, S. D. 2008. Dietary composition specifies  
574 consumption, obesity, and lifespan in Drosophila melanogaster. *Aging cell*, 7, 478-490.
- 575 TEAM, R. C. & DC, R. J. U. H. W. R.-P. O. 2019. A language and environment for statistical computing.  
576 Vienna, Austria: R Foundation for Statistical Computing; 2012.
- 577 TEFIT, M., GILLET, B., JONCOUR, P., HUGHES, S. & LEULIER, F. 2017. Stable association of a Drosophila-  
578 derived microbiota with its animal partner and the nutritional environment upon transfer  
579 between populations and generations. *bioRxiv*, 111492.
- 580 THOMPSON, W. G., COOK, D. A., CLARK, M. M., BARDIA, A. & LEVINE, J. A. Treatment of obesity. Mayo  
581 Clinic Proceedings, 2007. Elsevier, 93-102.
- 582 VACCA, M., CELANO, G., CALABRESE, F. M., PORTINCASA, P., GOBBETTI, M. & DE ANGELIS, M. J. M. 2020.  
583 The Controversial Role of Human Gut Lachnospiraceae. 8, 573.
- 584 VACCHINI, V., GONELLA, E., CROTTI, E., PROSDOCIMI, E. M., MAZZETTO, F., CHOUAIA, B., CALLEGARI, M.,  
585 MAPELLI, F., MANDRIOLI, M. & ALMA, A. 2017. Bacterial diversity shift determined by different  
586 diets in the gut of the spotted wing fly Drosophila suzukii is primarily reflected on acetic acid  
587 bacteria. *Environmental microbiology reports*, 9, 91-103.
- 588 VANDEHOEF, C., MOLAEI, M. & KARPAC, J. J. C. R. 2020. Dietary Adaptation of Microbiota in Drosophila  
589 Requires NF-κB-Dependent Control of the Translational Regulator 4E-BP. 31, 107736.
- 590 VENABLES, W. & RIPLEY, B. 2002. Random and mixed effects. *Modern applied statistics with S*. Springer.
- 591 VER HOEF, J. M. & BOVENG, P. L. J. E. 2007. Quasi-Poisson vs. negative binomial regression: how should  
592 we model overdispersed count data? 88, 2766-2772.
- 593 VODOVAR, N., VINALS, M., LIEHL, P., BASSET, A., DEGROUARD, J., SPELLMAN, P., BOCCARD, F. &  
594 LEMAITRE, B. 2005. Drosophila host defense after oral infection by an entomopathogenic  
595 Pseudomonas species. *Proceedings of the National Academy of Sciences of the United States of*  
596 *America*, 102, 11414-11419.
- 597 VOLYNETS, V., LOUIS, S., PRETZ, D., LANG, L., OSTAFF, M. J., WEHKAMP, J. & BISCHOFF, S. C. J. T. J. O. N.  
598 2017. Intestinal barrier function and the gut microbiome are differentially affected in mice fed a  
599 western-style diet or drinking water supplemented with fructose. 147, 770-780.

- 600 VON FRIELING, J., FAISAL, M. N., SPORN, F., PFEFFERKORN, R., NOLTE, S. S., SOMMER, F., ROSENSTIEL, P.  
601 & ROEDER, T. J. P. G. 2020. A high-fat diet induces a microbiota-dependent increase in stem cell  
602 activity in the *Drosophila* intestine. 16, e1008789.
- 603 WAHBA, I. M. & MAK, R. H. 2007. Obesity and obesity-initiated metabolic syndrome: mechanistic links to  
604 chronic kidney disease. *Clinical Journal of the American Society of Nephrology*, 2, 550-562.
- 605 WANG, H., LIU, C., LIU, Z., WANG, Y., MA, L. & XU, B. J. B. M. 2020. The different dietary sugars modulate  
606 the composition of the gut microbiota in honeybee during overwintering. 20, 1-14.
- 607 WATANABE, L. P. & RIDDLE, N. C. 2017. Characterization of the Rotating Exercise Quantification System  
608 (REQS), a novel *Drosophila* exercise quantification apparatus. *PLoS one*, 12, e0185090.
- 609 WICKHAM, H. 2016. *ggplot2: elegant graphics for data analysis*, springer.
- 610 WINANS, N. J., WALTER, A., CHOUAIA, B., CHASTON, J. M., DOUGLAS, A. E. & NEWELL, P. D. J. M. E. 2017.  
611 A genomic investigation of ecological differentiation between free-living and *Drosophila*-  
612 associated bacteria. 26, 4536-4550.
- 613 WONG, A. C.-N., DOBSON, A. J. & DOUGLAS, A. E. 2014. Gut microbiota dictates the metabolic response  
614 of *Drosophila* to diet. *Journal of Experimental Biology*, 217, 1894-1901.
- 615 WONG, A. C.-N., LUO, Y., JING, X., FRANZENBURG, S., BOST, A. & DOUGLAS, A. E. 2015. The host as the  
616 driver of the microbiota in the gut and external environment of *Drosophila melanogaster*. *Appl.*  
617 *Environ. Microbiol.*, 81, 6232-6240.
- 618 XIAO, S., FEI, N., PANG, X., SHEN, J., WANG, L., ZHANG, B., ZHANG, M., ZHANG, X., ZHANG, C. & LI, M. J.  
619 F. M. E. 2014. A gut microbiota-targeted dietary intervention for amelioration of chronic  
620 inflammation underlying metabolic syndrome. 87, 357-367.
- 621 YIN, X., LEE, B., ZARAGOZA, J. & MARCO, M. L. J. S. R. 2017. Dietary perturbations alter the ecological  
622 significance of ingested *Lactobacillus plantarum* in the digestive tract. 7, 1-13.
- 623 ZHANG, H., DIBASE, J. K., ZUCCOLO, A., KUDRNA, D., BRAIDOTTI, M., YU, Y., PARAMESWARAN, P.,  
624 CROWELL, M. D., WING, R. & RITTMANN, B. E. 2009. Human gut microbiota in obesity and after  
625 gastric bypass. *Proceedings of the National Academy of Sciences*, 106, 2365-2370.
- 626
